# Supplementary material for: A gene expression map of Arabidopsis thaliana development
Source: Springer Nature journal article supplement (doi:10.1038/ng1543), 2005-04-03
Supplement: 41588_2005_BFng1543_MOESM1_ESM.pdf [file 41588_2005_BFng1543_MOESM1_ESM.pdf]

## Schmid *et al.*: A gene expression map of *Arabidopsis* development

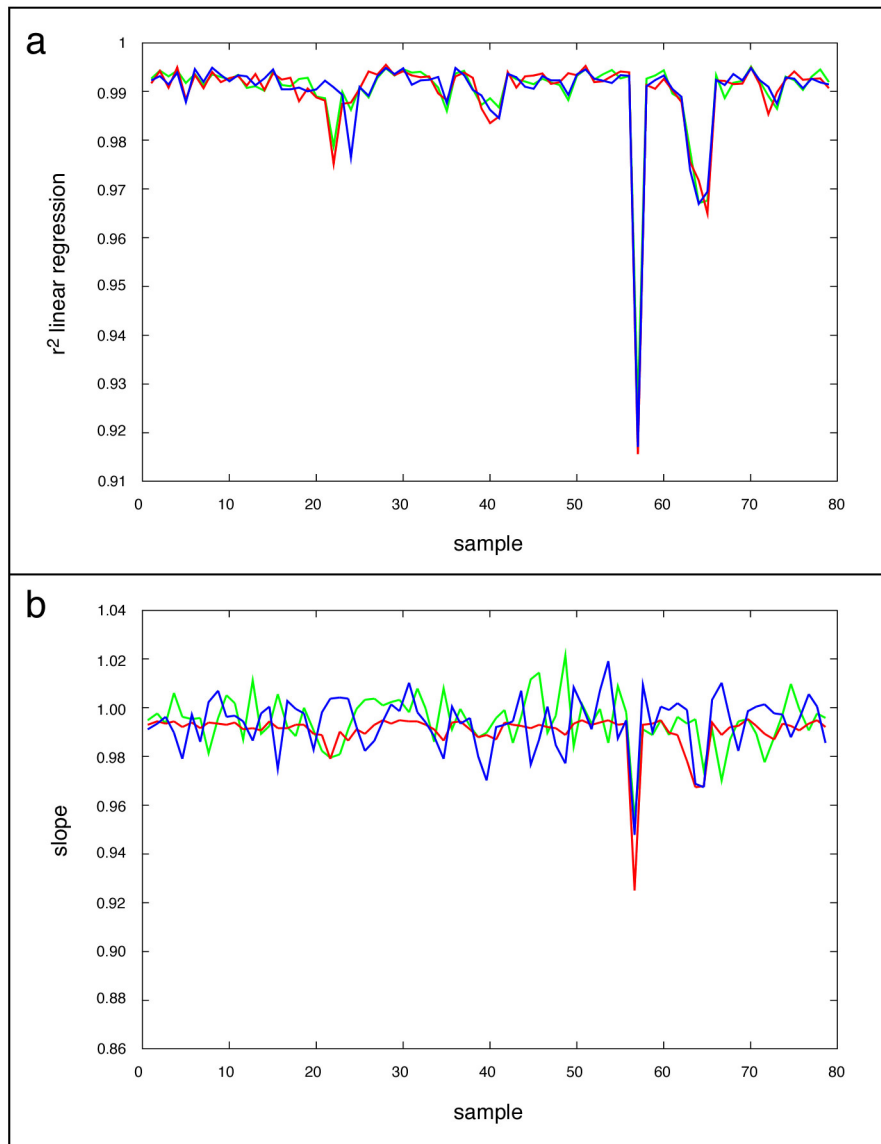

### Supplementary Figure 1. Assessment of replicate quality for 79 samples probed in triplicate.

**a)**  $r^2$  linear regression statistic of all three pair-wise comparisons as a measure of “goodness-of-fit” between replicates. Pollen and mature seeds have the least highly correlated replicates, with  $r^2 = 0.91$  and  $0.97$ , respectively. **b)** As a measure of correlation, the slope for all pair-wise comparisons across replicates is shown. See Supplementary Table 1 for identification of sample identifiers, shown here in numeric order.
