# Supplementary material for: A gene expression map of Arabidopsis thaliana development
Source: Springer Nature journal article supplement (doi:10.1038/ng1543), 2005-04-03
Supplement: 41588_2005_BFng1543_MOESM3_ESM.pdf [file 41588_2005_BFng1543_MOESM3_ESM.pdf]

## Schmid *et al.*: A gene expression map of *Arabidopsis* development

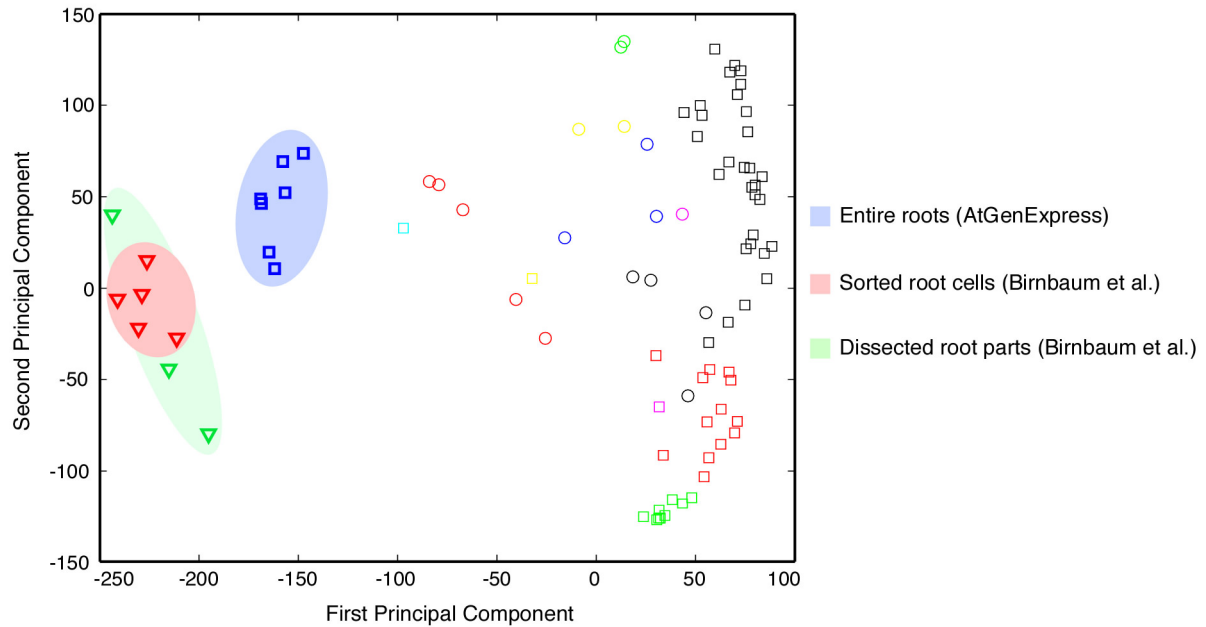

**Supplementary Figure 3. Principal Component Analysis of expression estimates from entire organs and tissues (this study) and sorted root cells (Birnbaum, K. *et al.* A gene expression map of the *Arabidopsis* root. *Science* 302, 1956-60; 2003).**

Sorted cells and dissected parts of roots map to the same region of the PCA graph as entire roots. PCA distances between cell types are comparable to the distances observed in entire roots. The separation of the two datasets likely reflects differences in probe preparation and hybridization conditions.
