# Supplementary material for: A gene expression map of Arabidopsis thaliana development
Source: Springer Nature journal article supplement (doi:10.1038/ng1543), 2005-04-03
Supplement: 41588_2005_BFng1543_MOESM4_ESM.pdf [file 41588_2005_BFng1543_MOESM4_ESM.pdf]

**Schmid *et al.*: A gene expression map of *Arabidopsis* development**

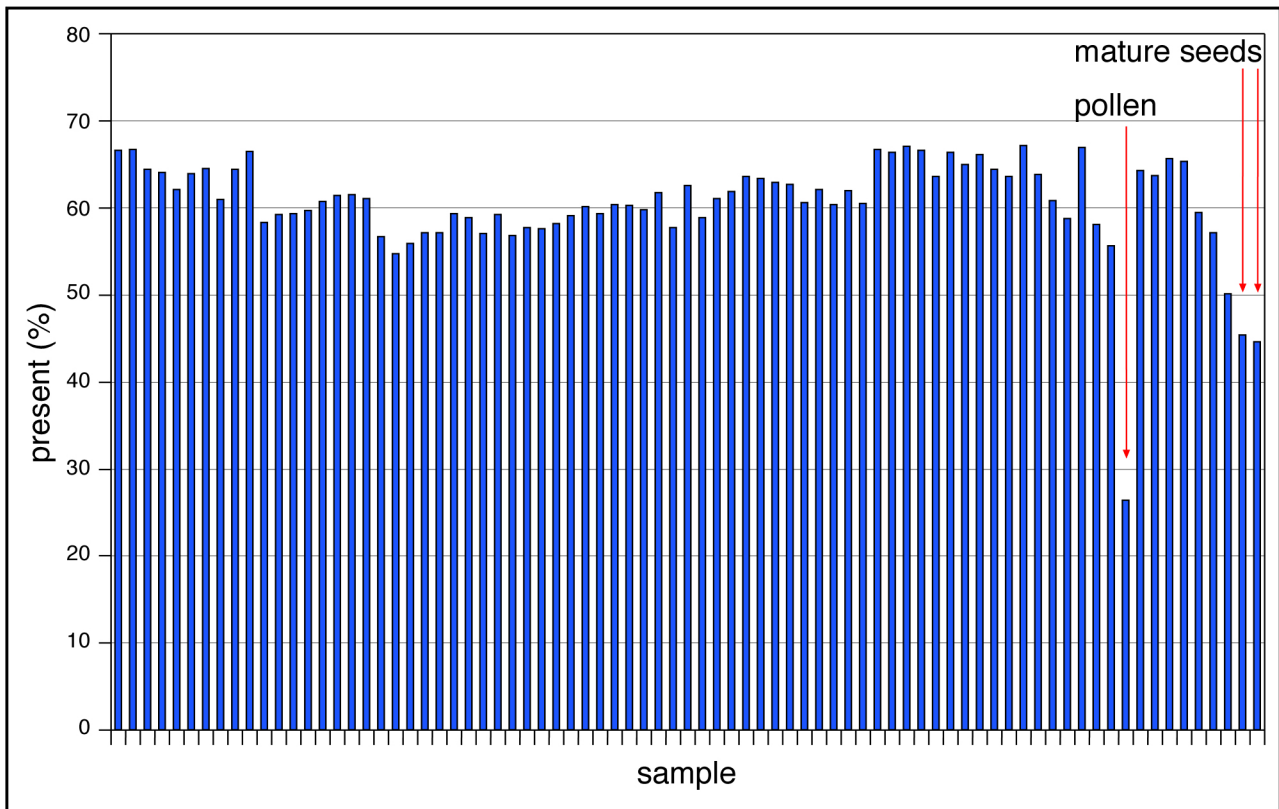

**Supplementary Figure 4. Fraction of genes detected in each sample.**

Number of genes with “present” calls in all three replicates is shown. Notably different are pollen and mature seeds. Arrangement of samples is according to the 13 clusters identified by PCA (see Figure 2a), which is different from the numbering shown in Supplementary Figure 1.
