# Supplementary material for: A gene expression map of Arabidopsis thaliana development
Source: Springer Nature journal article supplement (doi:10.1038/ng1543), 2005-04-03
Supplement: 41588_2005_BFng1543_MOESM5_ESM.pdf [file 41588_2005_BFng1543_MOESM5_ESM.pdf]

# Schmid *et al.*: A gene expression map of *Arabidopsis* development

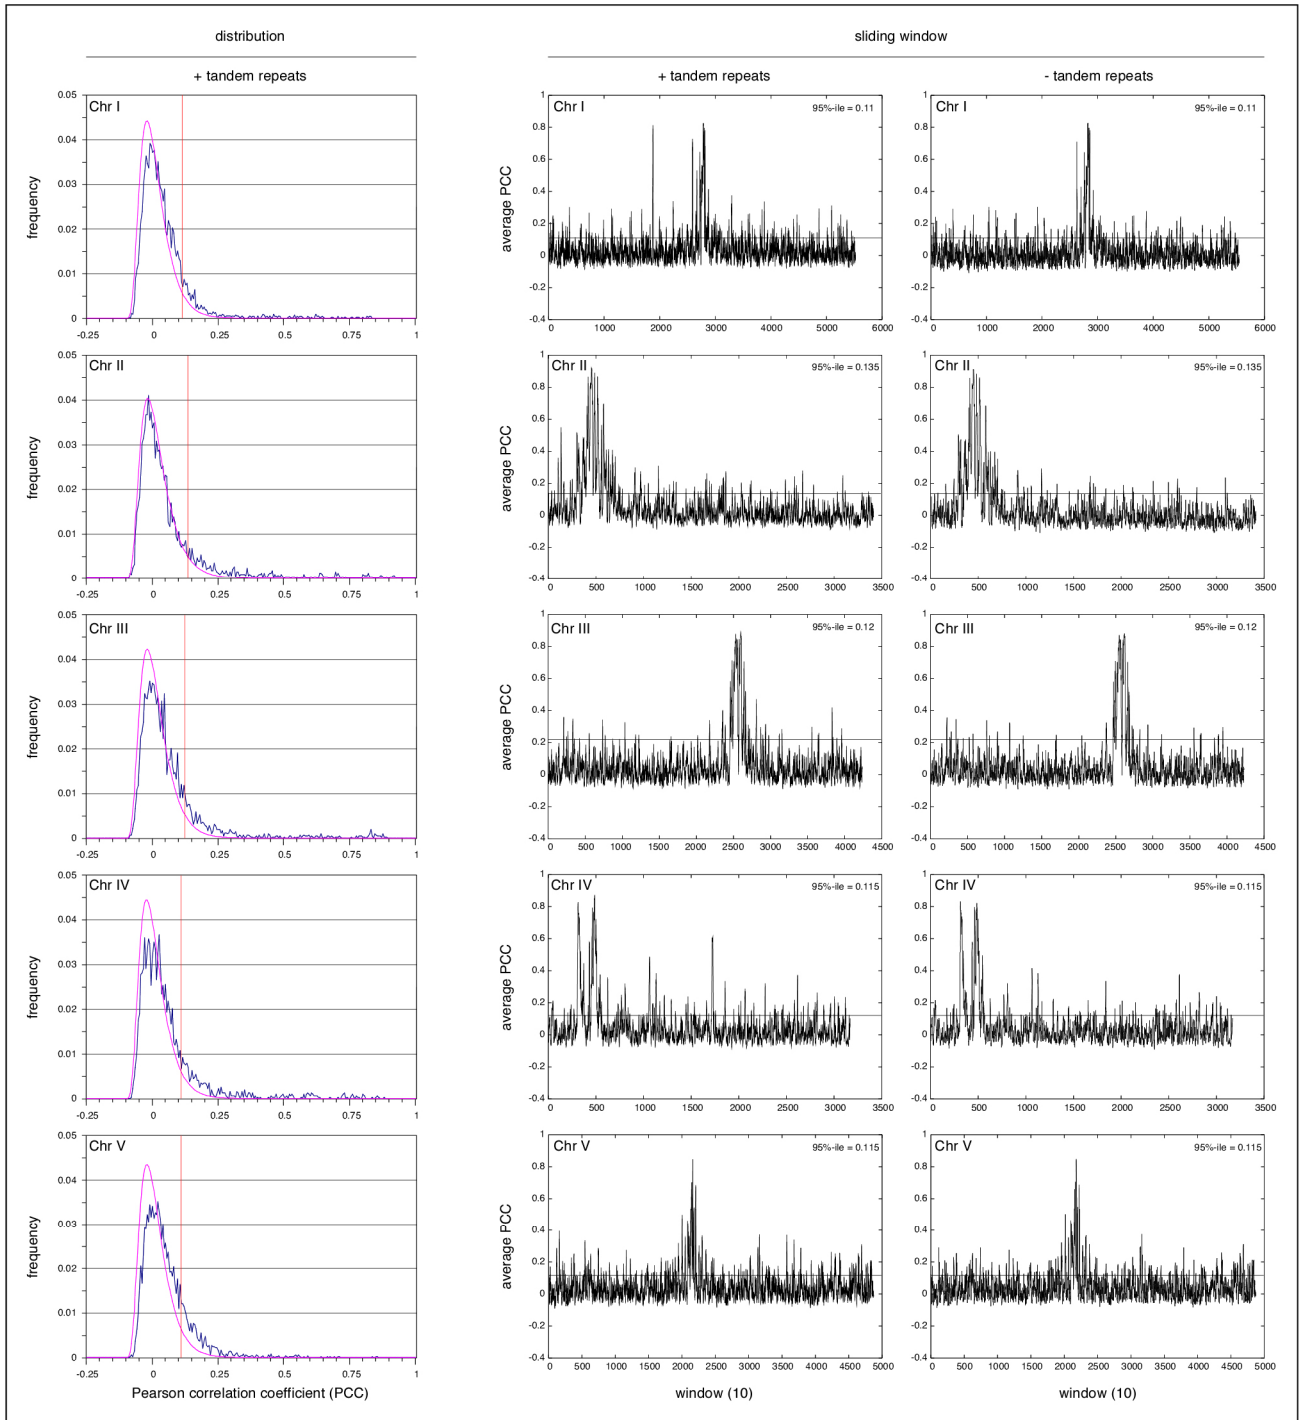

**Supplementary Figure 5. Sliding-window analysis of co-expression along each chromosome.**

Left, Distribution of average Pearson correlation coefficient (PCC) of 10 adjacent genes along each chromosome (blue line) compared to 10,000 permuted chromosomes (pink line). 95th percentiles are indicated in red. Right, Average PCC plotted against chromosomal location. 95th percentiles are indicated by horizontal lines.
