# Supplementary material for: A gene expression map of Arabidopsis thaliana development
Source: Springer Nature journal article supplement (doi:10.1038/ng1543), 2005-04-03
Supplement: 41588_2005_BFng1543_MOESM6_ESM.pdf [file 41588_2005_BFng1543_MOESM6_ESM.pdf]

## Schmid *et al.*: A gene expression map of *Arabidopsis* development

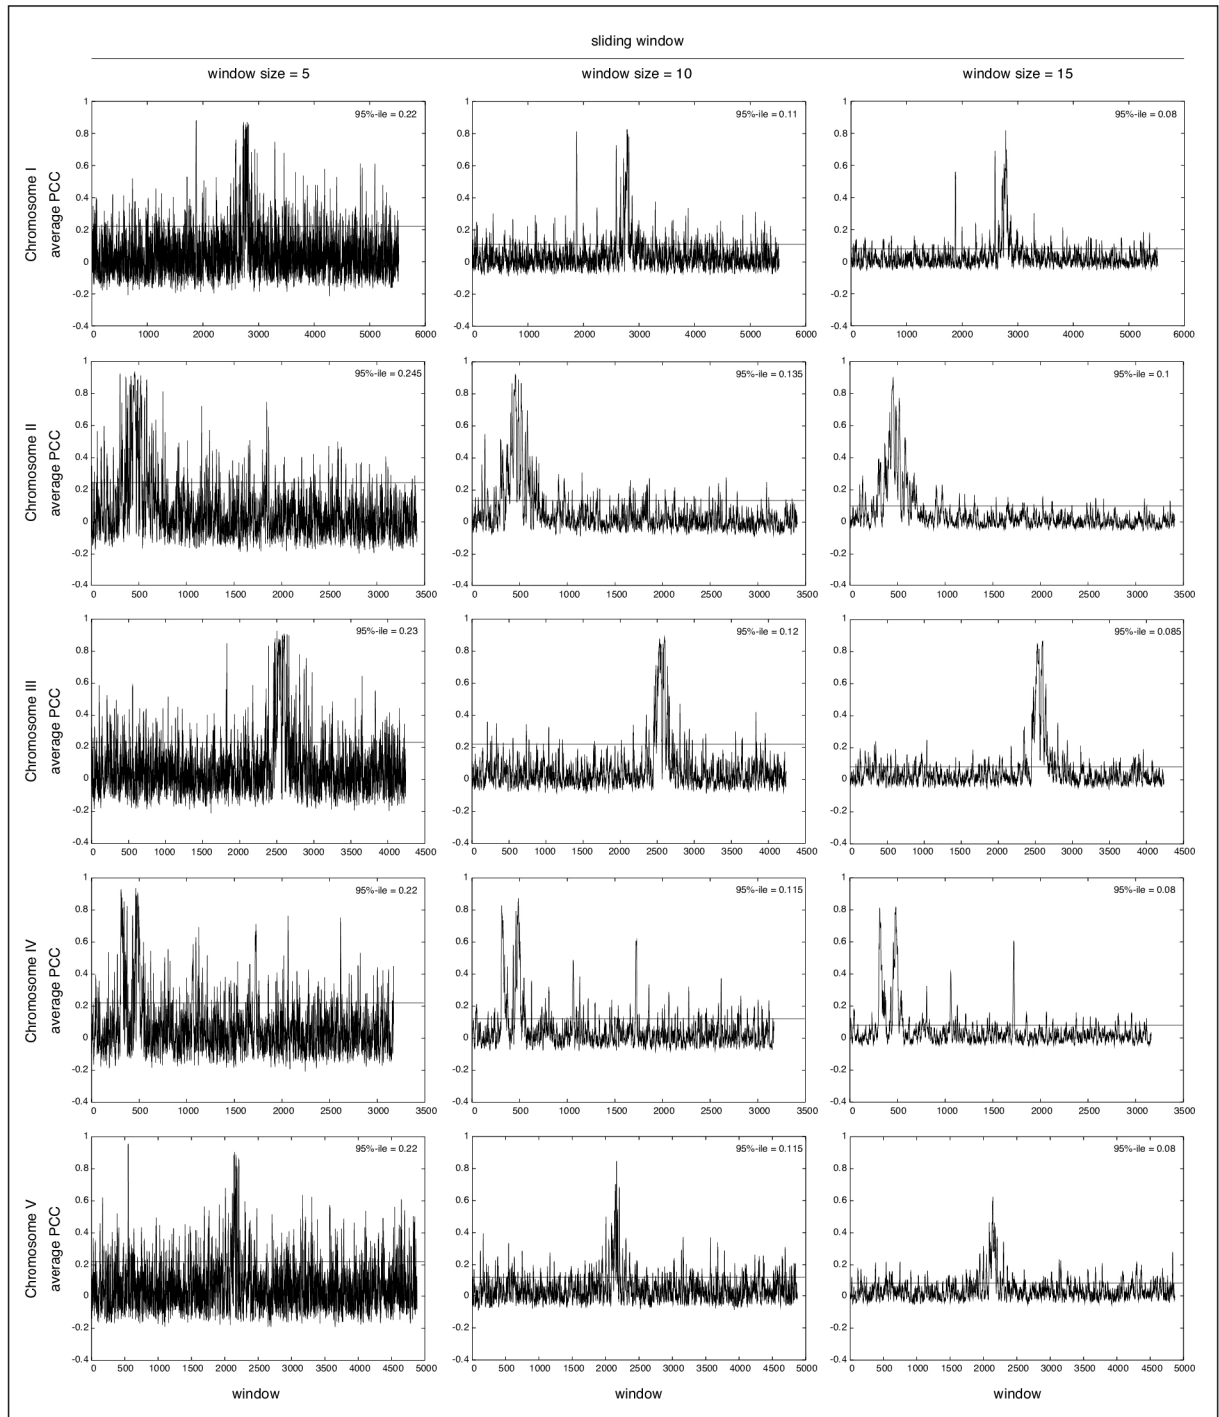

**Supplementary Figure 6. Sliding-window analysis of co-expression along each chromosome, using different window sizes.**

Average Pearson correlation coefficient (PCC) is shown. Horizontal lines indicate 95th percentiles as deduced from 10,000 permutations
