# Supplementary material for: A gene expression map of Arabidopsis thaliana development
Source: Springer Nature journal article supplement (doi:10.1038/ng1543), 2005-04-03
Supplement: 41588_2005_BFng1543_MOESM7_ESM.pdf [file 41588_2005_BFng1543_MOESM7_ESM.pdf]

## Schmid *et al.*: A gene expression map of *Arabidopsis* development

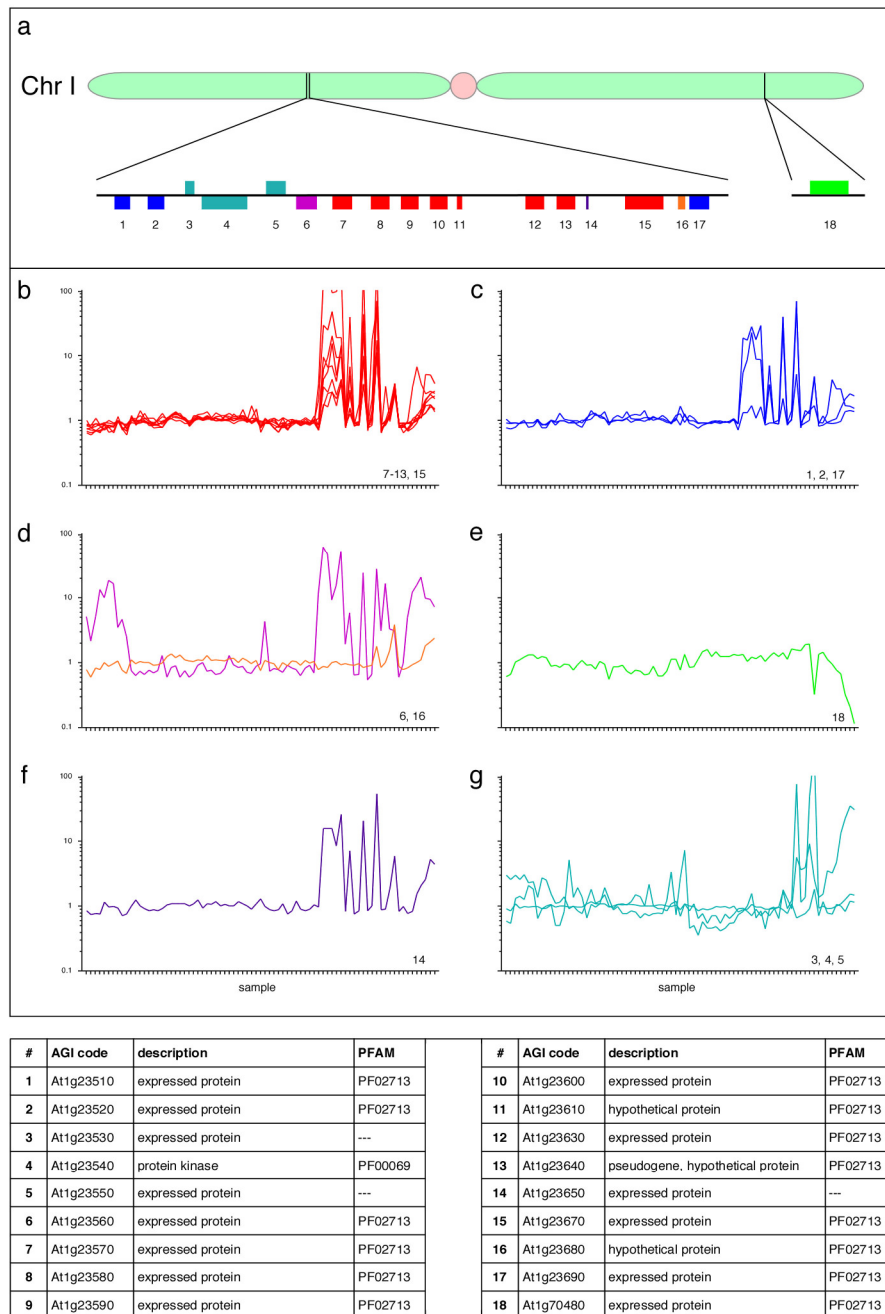

### Supplementary Figure 7. Genes encoding the PF02713 (DUF220) protein domain form a hot-spot of co-expression on chromosome I.

**a)** The *Arabidopsis* genome comprises 16 genes with a PF02713 (DUF220) domain, 15 of which form a cluster on the left arm of chromosome I. Four unrelated genes are interspersed in this cluster, and one additional PF02713 gene is located on the right arm of chromosome I. **b)** A set of 8 immediately adjacent PF02713 genes are highly expressed in stamens and seeds. **c)** Three PF02713 genes located to the left and right of the former set are also exclusively expressed in stamens and seeds. **d)** In addition to stamen-specific expression, At1g23560 is expressed in roots. At1g23680 shows only limited correlation to the other PF02713 genes within the cluster. **e)** In contrast, the PF02713 gene located on the right arm of chromosome I (At1g70480) has a complementary expression profile. **f)** At1g23650 encodes a protein of 28 amino acids, which does not contain any known domains but is strongly correlated with the core set of eight DUF220 genes. **g)** Three genes (At1g23530, At1g23540, At1g23550) unrelated to the DUF220 genes are expressed most highly in roots, pollen, and seeds, respectively.
