# Supplementary material for: A gene expression map of Arabidopsis thaliana development
Source: Springer Nature journal article supplement (doi:10.1038/ng1543), 2005-04-03
Supplement: 41588_2005_BFng1543_MOESM8_ESM.pdf [file 41588_2005_BFng1543_MOESM8_ESM.pdf]

## Schmid *et al.*: A gene expression map of *Arabidopsis* development

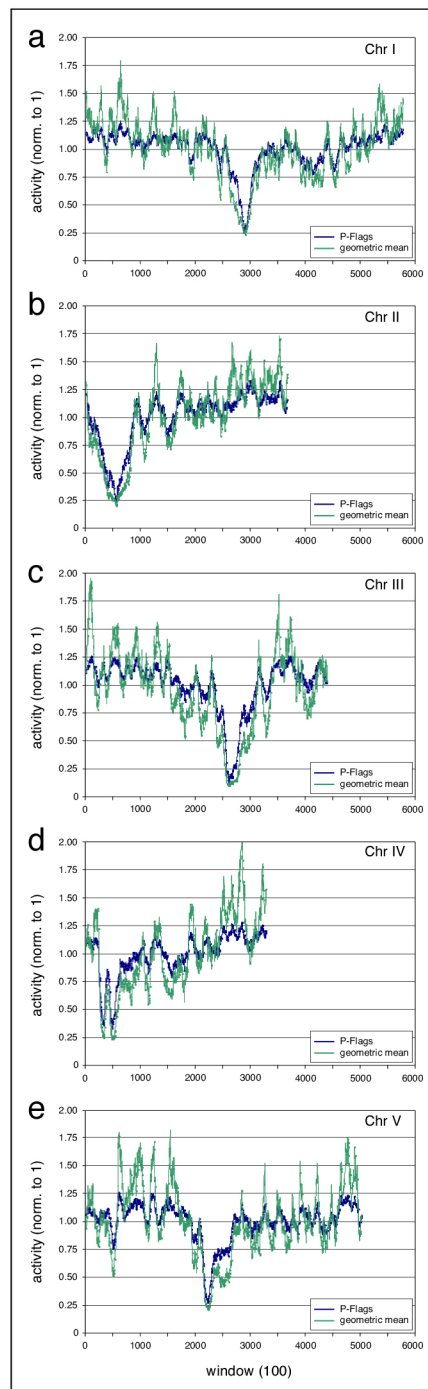

**Supplementary Figure 8. Sliding window analysis of averaged expression levels along each chromosome.**

Blue line indicates average P-calls of 100 adjacent genes, green line geometric means of expression levels. Both measures are normalized to a median of 1.
