# Supplementary material for: A gene expression map of Arabidopsis thaliana development
Source: Springer Nature journal article supplement (doi:10.1038/ng1543), 2005-04-03
Supplement: 41588_2005_BFng1543_MOESM9_ESM.pdf [file 41588_2005_BFng1543_MOESM9_ESM.pdf]

## Schmid *et al.*: A gene expression map of *Arabidopsis* development

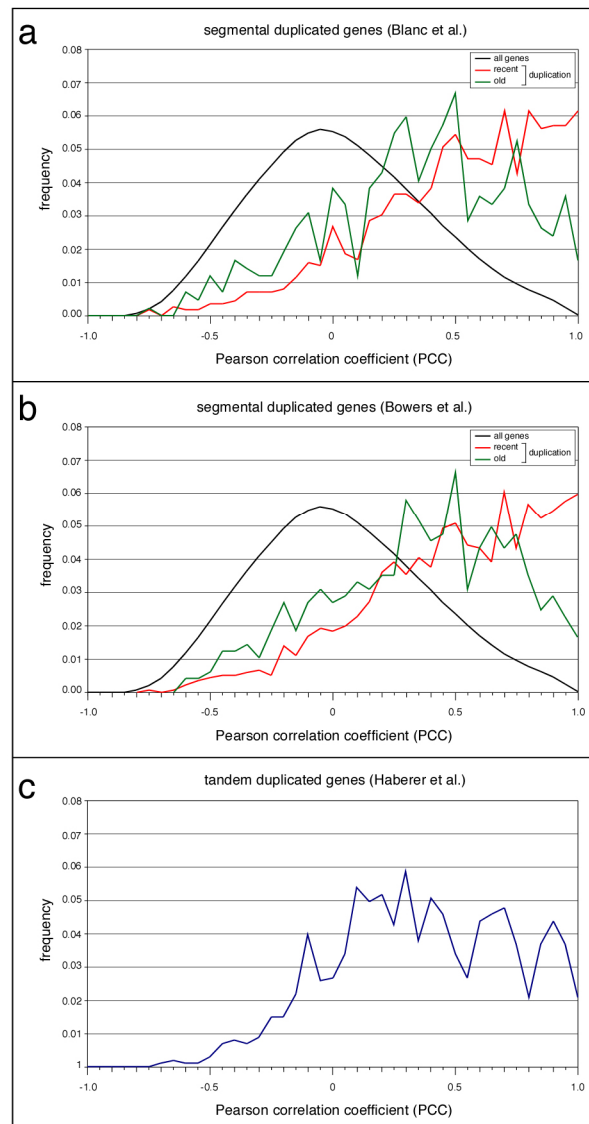

### Supplementary Figure 9. Extent of correlated expression among duplicated genes.

**a, b)** Segmentally duplicated genes as defined by Blanc and colleagues (Blanc, G. & Wolfe, K.H. Functional divergence of duplicated genes formed by polyploidy during *Arabidopsis* evolution. *Plant Cell* 16, 1679-91; 2004). and Bowers and colleagues (Bowers, J.E., Chapman, B.A., Rong, J. & Paterson, A.H. Unravelling angiosperm genome evolution by phylogenetic analysis of chromosomal duplication events. *Nature* 422, 433-8; 2003). Distribution of pair-wise Pearson correlation coefficients of all probe sets (black), young duplicates (red), and older duplicates (green) are shown. **c)** Distribution of pair-wise Pearson correlation coefficients of tandem duplicated genes as defined by Haberer and colleagues (Haberer, G., Hindemitt, T., Meyers, B.C. & Mayer, K.F. Transcriptional similarities, dissimilarities, and conservation of cis-elements in duplicated genes of *Arabidopsis*. *Plant Physiol.* 136, 3009-22; 2004).
