# Supplementary material for: A gene expression map of Arabidopsis thaliana development
Source: Springer Nature journal article supplement (doi:10.1038/ng1543), 2005-04-03
Supplement: 41588_2005_BFng1543_MOESM10_ESM.pdf [file 41588_2005_BFng1543_MOESM10_ESM.pdf]

**Schmid *et al.*: A gene expression map of *Arabidopsis* development**

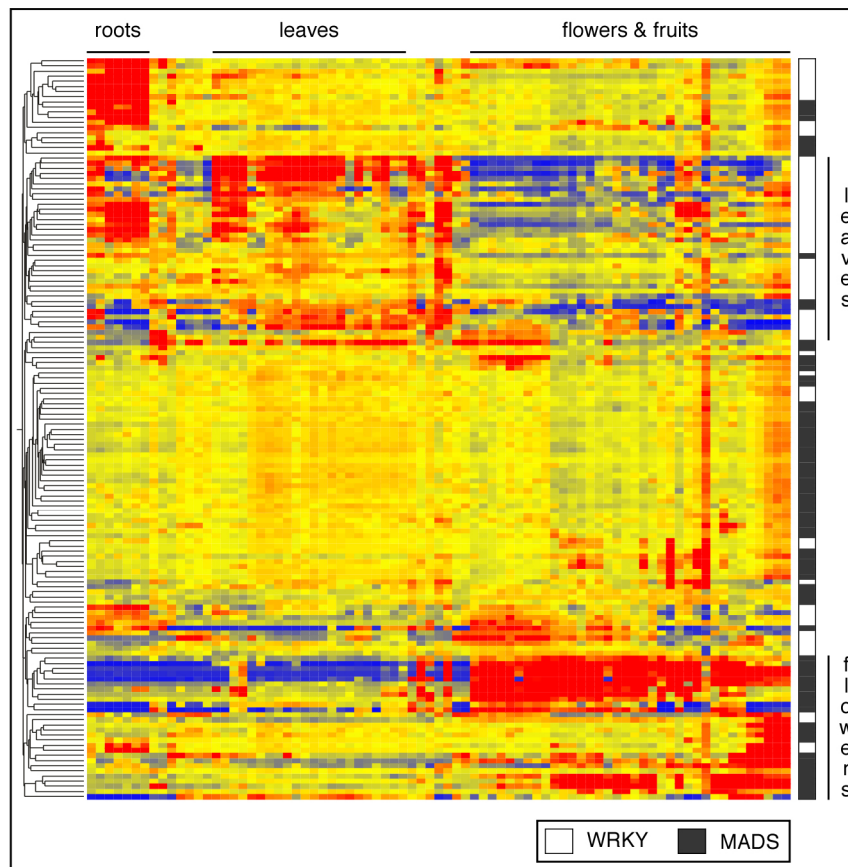

**Supplementary Figure 10. Hierarchical clustering of genes encoding WRKY and MADS domain transcription factors.**

Both families segregate into largely non-overlapping clusters, with many WRKY genes being preferentially expressed in leaves, and MADS box genes in flowers and fruits. High expression levels indicated in red, low levels in blue.
