# Supplementary material for: A gene expression map of Arabidopsis thaliana development
Source: Springer Nature journal article supplement (doi:10.1038/ng1543), 2005-04-03
Supplement: 41588_2005_BFng1543_MOESM11_ESM.pdf [file 41588_2005_BFng1543_MOESM11_ESM.pdf]

Supplementary Table 1. Sample descriptions and growth conditions

| #  | Sample ID | Genotype     | Tissue                                                                                | Age      | Photoperiod      | Substrate |
|----|-----------|--------------|---------------------------------------------------------------------------------------|----------|------------------|-----------|
| 1  | ATGE_1    | wild type    | cotyledon                                                                             | 7 days   | continuous light | soil      |
| 2  | ATGE_2    | wild type    | hypocotyl                                                                             | 7 days   | continuous light | soil      |
| 3  | ATGE_3    | wild type    | root                                                                                  | 7 days   | continuous light | soil      |
| 4  | ATGE_4    | wild type    | shoot apex, vegetative + young leaves                                                 | 7 days   | continuous light | soil      |
| 5  | ATGE_5    | wild type    | leaves 1 + 2                                                                          | 7 days   | continuous light | soil      |
| 6  | ATGE_6    | wild type    | shoot apex, vegetative                                                                | 7 days   | continuous light | soil      |
| 7  | ATGE_7    | wild type    | seedling, green parts                                                                 | 7 days   | continuous light | soil      |
| 8  | ATGE_8    | wild type    | shoot apex, transition (before bolting)                                               | 14 days  | continuous light | soil      |
| 9  | ATGE_9    | wild type    | roots                                                                                 | 17 days  | continuous light | soil      |
| 10 | ATGE_10   | wild type    | rosette leaf #4, 1 cm long                                                            | 10 days  | continuous light | soil      |
| 11 | ATGE_11   | <i>gl1-T</i> | rosette leaf #4, 1 cm long                                                            | 10 days  | continuous light | soil      |
| 12 | ATGE_12   | wild type    | rosette leaf # 2                                                                      | 17 days  | continuous light | soil      |
| 13 | ATGE_13   | wild type    | rosette leaf # 4                                                                      | 17 days  | continuous light | soil      |
| 14 | ATGE_14   | wild type    | rosette leaf # 6                                                                      | 17 days  | continuous light | soil      |
| 15 | ATGE_15   | wild type    | rosette leaf # 8                                                                      | 17 days  | continuous light | soil      |
| 16 | ATGE_16   | wild type    | rosette leaf # 10                                                                     | 17 days  | continuous light | soil      |
| 17 | ATGE_17   | wild type    | rosette leaf # 12                                                                     | 17 days  | continuous light | soil      |
| 18 | ATGE_18   | <i>gl1-T</i> | rosette leaf # 12                                                                     | 17 days  | continuous light | soil      |
| 19 | ATGE_19   | wild type    | leaf 7, petiole                                                                       | 17 days  | continuous light | soil      |
| 20 | ATGE_20   | wild type    | leaf 7, proximal half                                                                 | 17 days  | continuous light | soil      |
| 21 | ATGE_21   | wild type    | leaf 7, distal half                                                                   | 17 days  | continuous light | soil      |
| 22 | ATGE_22   | wild type    | developmental drift, entire rosette after transition to flowering, but before bolting | 21 days  | continuous light | soil      |
| 23 | ATGE_23   | wild type    | as above                                                                              | 22 days  | continuous light | soil      |
| 24 | ATGE_24   | wild type    | as above                                                                              | 23 days  | continuous light | soil      |
| 25 | ATGE_25   | wild type    | senescing leaf                                                                        | 35 days  | continuous light | soil      |
| 26 | ATGE_26   | wild type    | cauline leaf                                                                          | 21+ days | continuous light | soil      |
| 27 | ATGE_27   | wild type    | stem, 2nd internode                                                                   | 21+ days | continuous light | soil      |
| 28 | ATGE_28   | wild type    | stem, 1st node                                                                        | 21+ days | continuous light | soil      |
| 29 | ATGE_29   | wild type    | shoot apex, inflorescence (after bolting)                                             | 21 days  | continuous light | soil      |
| 30 | ATGE_31   | wild type    | flower, stage 9                                                                       | 21+ days | continuous light | soil      |
| 31 | ATGE_32   | wild type    | flower, stage 10/11                                                                   | 21+ days | continuous light | soil      |
| 32 | ATGE_33   | wild type    | flower, stage 12                                                                      | 21+ days | continuous light | soil      |
| 33 | ATGE_34   | wild type    | flower, stage 12, sepals                                                              | 21+ days | continuous light | soil      |
| 34 | ATGE_35   | wild type    | flower, stage 12, petals                                                              | 21+ days | continuous light | soil      |

|    |                |               |                                                                                          |          |                   |                        |
|----|----------------|---------------|------------------------------------------------------------------------------------------|----------|-------------------|------------------------|
| 35 | <b>ATGE_36</b> | wild type     | flower, stage 12, stamens                                                                | 21+ days | continuous light  | soil                   |
| 36 | <b>ATGE_37</b> | wild type     | flower, stage 12, carpels                                                                | 21+ days | continuous light  | soil                   |
| 37 | <b>ATGE_39</b> | wild type     | flower, stage 15                                                                         | 21+ days | continuous light  | soil                   |
| 38 | <b>ATGE_40</b> | wild type     | flower, stage 15, pedicels                                                               | 21+ days | continuous light  | soil                   |
| 39 | <b>ATGE_41</b> | wild type     | flower, stage 15, sepals                                                                 | 21+ days | continuous light  | soil                   |
| 40 | <b>ATGE_42</b> | wild type     | flower, stage 15, petals                                                                 | 21+ days | continuous light  | soil                   |
| 41 | <b>ATGE_43</b> | wild type     | flower, stage 15, stamen                                                                 | 21+ days | continuous light  | soil                   |
| 42 | <b>ATGE_45</b> | wild type     | flower, stage 15, carpels                                                                | 21+ days | continuous light  | soil                   |
| 43 | <b>ATGE_46</b> | <i>clv3-7</i> | shoot apex, inflorescence (after bolting)                                                | 21+ days | continuous light  | soil                   |
| 44 | <b>ATGE_47</b> | <i>lfy-12</i> | shoot apex, inflorescence (after bolting)                                                | 21+ days | continuous light  | soil                   |
| 45 | <b>ATGE_48</b> | <i>ap1-15</i> | shoot apex, inflorescence (after bolting)                                                | 21+ days | continuous light  | soil                   |
| 46 | <b>ATGE_49</b> | <i>ap2-6</i>  | shoot apex, inflorescence (after bolting)                                                | 21+ days | continuous light  | soil                   |
| 47 | <b>ATGE_50</b> | <i>ap3-6</i>  | shoot apex, inflorescence (after bolting)                                                | 21+ days | continuous light  | soil                   |
| 48 | <b>ATGE_51</b> | <i>ag-12</i>  | shoot apex, inflorescence (after bolting)                                                | 21+ days | continuous light  | soil                   |
| 49 | <b>ATGE_52</b> | <i>ufo-1</i>  | shoot apex, inflorescence (after bolting)                                                | 21+ days | continuous light  | soil                   |
| 50 | <b>ATGE_53</b> | <i>clv3-7</i> | flower, stage 12; multi-carpel gynoecium; enlarged meristem; increased organ number      | 21+ days | continuous light  | soil                   |
| 51 | <b>ATGE_54</b> | <i>lfy-12</i> | flower, stage 12; shoot characteristics; most organs leaf-like                           | 21+ days | continuous light  | soil                   |
| 52 | <b>ATGE_55</b> | <i>ap1-15</i> | flower, stage 12; sepals replaced by leaf-like organs, petals mostly lacking, 2° flowers | 21+ days | continuous light  | soil                   |
| 53 | <b>ATGE_56</b> | <i>ap2-6</i>  | flower, stage 12; no sepals or petals                                                    | 21+ days | continuous light  | soil                   |
| 54 | <b>ATGE_57</b> | <i>ap3-6</i>  | flower, stage 12; no petals or stamens                                                   | 21+ days | continuous light  | soil                   |
| 55 | <b>ATGE_58</b> | <i>ag-12</i>  | flower, stage 12; no stamens or carpels                                                  | 21+ days | continuous light  | soil                   |
| 56 | <b>ATGE_59</b> | <i>ufo-1</i>  | flower, stage 12; filamentous organs in whorls two and three                             | 21+ days | continuous light  | soil                   |
| 57 | <b>ATGE_73</b> | wild type     | mature pollen                                                                            | 6 wk     | continuous light  | soil                   |
| 58 | <b>ATGE_76</b> | wild type     | siliqua, with seeds stage 3; mid globular to early heart embryo                          | 8 wk     | long day (16/8)   | soil                   |
| 59 | <b>ATGE_77</b> | wild type     | siliqua, with seeds stage 4; early to late heart embryo                                  | 8 wk     | long day (16/8)   | soil                   |
| 60 | <b>ATGE_78</b> | wild type     | siliqua, with seeds stage 5; late heart to mid torpedo embryo                            | 8 wk     | long day (16/8)   | soil                   |
| 61 | <b>ATGE_79</b> | wild type     | seed, stage 6; mid to late torpedo embryos                                               | 8 wk     | long day (16/8)   | soil                   |
| 62 | <b>ATGE_81</b> | wild type     | seed, stage 7; late torpedo to early walking-stick embryo                                | 8 wk     | long day (16/8)   | soil                   |
| 63 | <b>ATGE_82</b> | wild type     | seed, stage 8; walking-stick to early curled-cotyledons embryo                           | 8 wk     | long day (16/8)   | soil                   |
| 64 | <b>ATGE_83</b> | wild type     | seed, stage 9; curled-cotyledons to early green-cotyledons embryo                        | 8 wk     | long day (16/8)   | soil                   |
| 65 | <b>ATGE_84</b> | wild type     | seed, stage 10; green-cotyledons embryo                                                  | 8 wk     | long day (16/8)   | soil                   |
| 66 | <b>ATGE_87</b> | wild type     | vegetative rosette                                                                       | 7 days   | short day (10/14) | soil                   |
| 67 | <b>ATGE_89</b> | wild type     | vegetative rosette                                                                       | 14 days  | short day (10/14) | soil                   |
| 68 | <b>ATGE_90</b> | wild type     | vegetative rosette                                                                       | 21 days  | short day (10/14) | soil                   |
| 69 | <b>ATGE_91</b> | wild type     | leaf                                                                                     | 15 days  | long day (16/8)   | 1x MS agar, 1% sucrose |
| 70 | <b>ATGE_92</b> | wild type     | flower                                                                                   | 28 days  | long day (16/8)   | soil                   |
| 71 | <b>ATGE_93</b> | wild type     | root                                                                                     | 15 days  | long day (16/8)   | 1x MS agar, 1% sucrose |

|    |                 |           |                       |         |                  |                        |
|----|-----------------|-----------|-----------------------|---------|------------------|------------------------|
| 72 | <b>ATGE_94</b>  | wild type | root                  | 8 days  | continuous light | 1x MS agar             |
| 73 | <b>ATGE_95</b>  | wild type | root                  | 8 days  | continuous light | 1x MS agar, 1% sucrose |
| 74 | <b>ATGE_96</b>  | wild type | seedling, green parts | 8 days  | continuous light | 1x MS agar             |
| 75 | <b>ATGE_97</b>  | wild type | seedling, green parts | 8 days  | continuous light | 1x MS agar, 1% sucrose |
| 76 | <b>ATGE_98</b>  | wild type | root                  | 21 days | continuous light | 1x MS agar             |
| 77 | <b>ATGE_99</b>  | wild type | root                  | 21 days | continuous light | 1x MS agar, 1% sucrose |
| 78 | <b>ATGE_100</b> | wild type | seedling, green parts | 21 days | continuous light | 1x MS agar             |
| 79 | <b>ATGE_101</b> | wild type | seedling, green parts | 21 days | continuous light | 1x MS agar, 1% sucrose |
