# Supplementary material for: A gene expression map of Arabidopsis thaliana development
Source: Springer Nature journal article supplement (doi:10.1038/ng1543), 2005-04-03
Supplement: 41588_2005_BFng1543_MOESM12_ESM.pdf [file 41588_2005_BFng1543_MOESM12_ESM.pdf]

Supplementary Table 2. Summary statistics of replicate quality.

| #  | Sample ID | Pairs          |        |                |        |                |        |
|----|-----------|----------------|--------|----------------|--------|----------------|--------|
|    |           | A/B            |        | A/C            |        | B/C            |        |
|    |           | r <sup>2</sup> | slope  | r <sup>2</sup> | slope  | r <sup>2</sup> | slope  |
| 1  | ATGE_1    | 0,9922         | 0,9906 | 0,9916         | 0,9885 | 0,9926         | 0,9944 |
| 2  | ATGE_2    | 0,9931         | 0,9929 | 0,9942         | 0,9938 | 0,9943         | 0,9975 |
| 3  | ATGE_3    | 0,9914         | 0,9959 | 0,9908         | 0,9919 | 0,9931         | 0,9928 |
| 4  | ATGE_4    | 0,9938         | 0,9892 | 0,9949         | 0,9982 | 0,9942         | 1,0056 |
| 5  | ATGE_5    | 0,9878         | 0,9784 | 0,9884         | 0,9785 | 0,9917         | 0,9956 |
| 6  | ATGE_6    | 0,9945         | 0,9967 | 0,9934         | 0,9943 | 0,9935         | 0,9949 |
| 7  | ATGE_7    | 0,9920         | 0,9857 | 0,9906         | 0,9847 | 0,9912         | 0,9953 |
| 8  | ATGE_8    | 0,9948         | 1,0018 | 0,9939         | 0,9855 | 0,9935         | 0,9809 |
| 9  | ATGE_9    | 0,9934         | 1,0068 | 0,9919         | 1,0048 | 0,9929         | 0,9952 |
| 10 | ATGE_10   | 0,9920         | 0,9959 | 0,9927         | 1,0049 | 0,9925         | 1,0050 |
| 11 | ATGE_11   | 0,9933         | 0,9964 | 0,9931         | 1,0011 | 0,9934         | 1,0014 |
| 12 | ATGE_12   | 0,9931         | 0,9940 | 0,9912         | 0,9842 | 0,9907         | 0,9866 |
| 13 | ATGE_13   | 0,9912         | 0,9862 | 0,9936         | 1,0026 | 0,9910         | 1,0109 |
| 14 | ATGE_14   | 0,9926         | 0,9974 | 0,9903         | 0,9899 | 0,9901         | 0,9887 |
| 15 | ATGE_15   | 0,9944         | 1,0002 | 0,9937         | 0,9950 | 0,9942         | 0,9922 |
| 16 | ATGE_16   | 0,9904         | 0,9745 | 0,9924         | 0,9850 | 0,9913         | 1,0053 |
| 17 | ATGE_17   | 0,9904         | 1,0025 | 0,9928         | 0,9999 | 0,9911         | 0,9917 |
| 18 | ATGE_18   | 0,9907         | 0,9989 | 0,9880         | 0,9892 | 0,9925         | 0,9879 |
| 19 | ATGE_19   | 0,9900         | 0,9974 | 0,9906         | 1,0009 | 0,9928         | 0,9996 |
| 20 | ATGE_20   | 0,9904         | 0,9825 | 0,9887         | 0,9775 | 0,9889         | 0,9902 |
| 21 | ATGE_21   | 0,9922         | 0,9975 | 0,9881         | 0,9830 | 0,9886         | 0,9818 |
| 22 | ATGE_22   | 0,9909         | 1,0032 | 0,9751         | 0,9848 | 0,9787         | 0,9789 |
| 23 | ATGE_23   | 0,9893         | 1,0036 | 0,9874         | 0,9879 | 0,9899         | 0,9803 |
| 24 | ATGE_24   | 0,9765         | 1,0032 | 0,9877         | 1,0067 | 0,9862         | 0,9909 |
| 25 | ATGE_25   | 0,9909         | 0,9917 | 0,9906         | 0,9951 | 0,9908         | 0,9990 |
| 26 | ATGE_26   | 0,9891         | 0,9820 | 0,9940         | 0,9930 | 0,9887         | 1,0030 |
| 27 | ATGE_27   | 0,9931         | 0,9863 | 0,9934         | 0,9933 | 0,9927         | 1,0033 |
| 28 | ATGE_28   | 0,9948         | 0,9941 | 0,9954         | 0,9975 | 0,9947         | 1,0005 |
| 29 | ATGE_29   | 0,9935         | 1,0012 | 0,9933         | 1,0064 | 0,9932         | 1,0019 |
| 30 | ATGE_31   | 0,9947         | 0,9980 | 0,9942         | 1,0034 | 0,9946         | 1,0029 |
| 31 | ATGE_32   | 0,9913         | 1,0099 | 0,9932         | 1,0115 | 0,9939         | 0,9975 |
| 32 | ATGE_33   | 0,9923         | 0,9976 | 0,9929         | 1,0084 | 0,9940         | 1,0075 |
| 33 | ATGE_34   | 0,9924         | 0,9934 | 0,9931         | 0,9963 | 0,9928         | 0,9990 |
| 34 | ATGE_35   | 0,9929         | 0,9877 | 0,9896         | 0,9766 | 0,9908         | 0,9858 |
| 35 | ATGE_36   | 0,9876         | 0,9785 | 0,9882         | 0,9930 | 0,9860         | 1,0074 |
| 36 | ATGE_37   | 0,9948         | 1,0000 | 0,9931         | 0,9930 | 0,9936         | 0,9906 |
| 37 | ATGE_39   | 0,9933         | 0,9929 | 0,9938         | 0,9955 | 0,9942         | 0,9994 |
| 38 | ATGE_40   | 0,9903         | 0,9955 | 0,9928         | 0,9938 | 0,9905         | 0,9923 |
| 39 | ATGE_41   | 0,9892         | 0,9795 | 0,9865         | 0,9721 | 0,9872         | 0,9874 |
| 40 | ATGE_42   | 0,9862         | 0,9696 | 0,9835         | 0,9633 | 0,9885         | 0,9892 |
| 41 | ATGE_43   | 0,9845         | 0,9919 | 0,9848         | 0,9942 | 0,9867         | 0,9955 |
| 42 | ATGE_45   | 0,9936         | 0,9925 | 0,9940         | 0,9947 | 0,9936         | 0,9988 |
| 43 | ATGE_46   | 0,9929         | 0,9942 | 0,9907         | 0,9822 | 0,9925         | 0,9853 |
| 44 | ATGE_47   | 0,9909         | 1,0064 | 0,9931         | 1,0075 | 0,9920         | 0,9959 |
| 45 | ATGE_48   | 0,9905         | 0,9761 | 0,9933         | 0,9927 | 0,9914         | 1,0113 |
| 46 | ATGE_49   | 0,9931         | 0,9867 | 0,9937         | 1,0046 | 0,9926         | 1,0141 |
| 47 | ATGE_50   | 0,9922         | 1,0001 | 0,9915         | 0,9930 | 0,9918         | 0,9891 |
| 48 | ATGE_51   | 0,9922         | 0,9844 | 0,9919         | 0,9848 | 0,9913         | 0,9962 |

|    |                 |        |        |        |        |        |        |
|----|-----------------|--------|--------|--------|--------|--------|--------|
| 49 | <b>ATGE_52</b>  | 0,9893 | 0,9767 | 0,9937 | 1,0053 | 0,9883 | 1,0210 |
| 50 | <b>ATGE_53</b>  | 0,9935 | 1,0082 | 0,9933 | 0,9952 | 0,9932 | 0,9838 |
| 51 | <b>ATGE_54</b>  | 0,9945 | 1,0005 | 0,9952 | 1,0044 | 0,9946 | 1,0009 |
| 52 | <b>ATGE_55</b>  | 0,9926 | 0,9909 | 0,9919 | 0,9875 | 0,9924 | 0,9931 |
| 53 | <b>ATGE_56</b>  | 0,9922 | 1,0064 | 0,9920 | 1,0087 | 0,9935 | 0,9991 |
| 54 | <b>ATGE_57</b>  | 0,9917 | 1,0190 | 0,9931 | 1,0074 | 0,9944 | 0,9851 |
| 55 | <b>ATGE_58</b>  | 0,9933 | 0,9872 | 0,9941 | 0,9998 | 0,9927 | 1,0086 |
| 56 | <b>ATGE_59</b>  | 0,9932 | 0,9947 | 0,9939 | 0,9963 | 0,9931 | 0,9978 |
| 57 | <b>ATGE_73</b>  | 0,9171 | 0,9474 | 0,9156 | 0,9388 | 0,9246 | 0,9536 |
| 58 | <b>ATGE_76</b>  | 0,9910 | 1,0088 | 0,9913 | 1,0031 | 0,9926 | 0,9906 |
| 59 | <b>ATGE_77</b>  | 0,9923 | 0,9896 | 0,9905 | 0,9807 | 0,9933 | 0,9885 |
| 60 | <b>ATGE_78</b>  | 0,9932 | 1,0002 | 0,9925 | 0,9971 | 0,9943 | 0,9944 |
| 61 | <b>ATGE_79</b>  | 0,9905 | 0,9987 | 0,9902 | 0,9923 | 0,9895 | 0,9885 |
| 62 | <b>ATGE_81</b>  | 0,9889 | 1,0014 | 0,9878 | 1,0025 | 0,9884 | 0,9957 |
| 63 | <b>ATGE_82</b>  | 0,9739 | 0,9985 | 0,9755 | 1,0038 | 0,9779 | 0,9932 |
| 64 | <b>ATGE_83</b>  | 0,9669 | 0,9686 | 0,9717 | 0,9823 | 0,9671 | 0,9949 |
| 65 | <b>ATGE_84</b>  | 0,9694 | 0,9668 | 0,9650 | 0,9552 | 0,9676 | 0,9741 |
| 66 | <b>ATGE_87</b>  | 0,9924 | 1,0029 | 0,9922 | 0,9970 | 0,9933 | 0,9908 |
| 67 | <b>ATGE_89</b>  | 0,9913 | 1,0099 | 0,9921 | 0,9854 | 0,9886 | 0,9697 |
| 68 | <b>ATGE_90</b>  | 0,9935 | 0,9948 | 0,9915 | 0,9846 | 0,9918 | 0,9867 |
| 69 | <b>ATGE_91</b>  | 0,9923 | 0,9817 | 0,9916 | 0,9795 | 0,9921 | 0,9941 |
| 70 | <b>ATGE_92</b>  | 0,9947 | 0,9982 | 0,9948 | 0,9956 | 0,9951 | 0,9949 |
| 71 | <b>ATGE_93</b>  | 0,9923 | 1,0001 | 0,9915 | 0,9927 | 0,9921 | 0,9891 |
| 72 | <b>ATGE_94</b>  | 0,9909 | 1,0010 | 0,9853 | 0,9811 | 0,9891 | 0,9775 |
| 73 | <b>ATGE_95</b>  | 0,9874 | 0,9973 | 0,9898 | 0,9926 | 0,9864 | 0,9873 |
| 74 | <b>ATGE_96</b>  | 0,9928 | 0,9970 | 0,9924 | 0,9973 | 0,9930 | 0,9970 |
| 75 | <b>ATGE_97</b>  | 0,9926 | 0,9877 | 0,9941 | 1,0016 | 0,9923 | 1,0095 |
| 76 | <b>ATGE_98</b>  | 0,9907 | 0,9951 | 0,9924 | 1,0002 | 0,9903 | 0,9994 |
| 77 | <b>ATGE_99</b>  | 0,9926 | 1,0053 | 0,9925 | 0,9990 | 0,9930 | 0,9903 |
| 78 | <b>ATGE_100</b> | 0,9918 | 1,0002 | 0,9926 | 1,0007 | 0,9945 | 0,9973 |
| 79 | <b>ATGE_101</b> | 0,9914 | 0,9850 | 0,9906 | 0,9840 | 0,9919 | 0,9953 |
