# Supplementary material for: A gene expression map of Arabidopsis thaliana development
Source: Springer Nature journal article supplement (doi:10.1038/ng1543), 2005-04-03
Supplement: 41588_2005_BFng1543_MOESM13_ESM.pdf [file 41588_2005_BFng1543_MOESM13_ESM.pdf]

**Supplementary Table 3.** Significance of differences in combined expression levels along each chromosome.

| Chr | window size |         |         |
|-----|-------------|---------|---------|
|     | 10          | 50      | 100     |
| 1   | 0.0028      | 0.1760  | 0.0180  |
| 2   | <0.0001     | 0.0022  | 0.0054  |
| 3   | <0.0001     | <0.0001 | <0.0001 |
| 4   | 0.0008      | 0.0004  | <0.0001 |
| 5   | <0.0001     | <0.0001 | <0.0001 |

For each chromosome, sliding windows of different sizes were analyzed and compared to 10,000 permutations of each chromosome. The 95<sup>th</sup> percentile of the natural chromosome was compared to the permuted chromosomes. A two-tailed p-value was calculated by counting the occurrences where the 95<sup>th</sup> percentile of the permuted chromosome was greater than that of the natural chromosome, then dividing by the number of permutations, and multiplying by 2 for the two-tailed test.
