# Supplementary material for: A gene expression map of Arabidopsis thaliana development
Source: Springer Nature journal article supplement (doi:10.1038/ng1543), 2005-04-03
Supplement: 41588_2005_BFng1543_MOESM14_ESM.pdf [file 41588_2005_BFng1543_MOESM14_ESM.pdf]

**Supplementary Table 4.** Coexpression of gene families.

Average of Pearson correlation coefficients (PCC) and number of members of families shown in Fig. 5b.

| Gene family (above 95 <sup>th</sup> percentile)           | # Genes | PCC     |
|-----------------------------------------------------------|---------|---------|
| 2-oxoglutarate/malate translocator precursor-like         | 3       | 0.68878 |
| 60S ribosomal L19 proteins                                | 3       | 0.84566 |
| AAAP family                                               | 39      | 0.11361 |
| AAA-type ATPases                                          | 3       | 0.59611 |
| ABC Superfamily: ATH subfamily                            | 16      | 0.12377 |
| ABC superfamily: MRP subfamily                            | 12      | 0.20237 |
| ABC Superfamily: SMC subfamily                            | 4       | 0.82877 |
| ABC transporter-like                                      | 24      | 0.07917 |
| ACA                                                       | 13      | 0.11736 |
| ACBP60s                                                   | 7       | 0.20314 |
| Acetyl-CoA carboxylase                                    | 4       | 0.68750 |
| Acyl-CoA Oxidase                                          | 6       | 0.41159 |
| Adenine phosphoribosyltransferase 1 APRT family           | 3       | 0.46421 |
| AGC Family: AGC1 subfamily                                | 17      | 0.14706 |
| Amino acid permease family                                | 23      | 0.07933 |
| Arabidopsis ARIADNE gene family                           | 13      | 0.33223 |
| AS2 family                                                | 26      | 0.08986 |
| AtCBLs (Calcineurin B-like Calcium Sensor Proteins)       | 9       | 0.18554 |
| AtCIPKs                                                   | 25      | 0.23833 |
| ATP Citrate Lyase subunit B                               | 2       | 0.79335 |
| AtStr                                                     | 18      | 0.18219 |
| AUX1 family                                               | 4       | 0.44482 |
| axi 1-like family                                         | 6       | 0.21492 |
| Beta-hydroxyacyl-ACP dehydratase family                   | 2       | 0.87756 |
| beta-keto-Coa synthase family                             | 14      | 0.13955 |
| Ca <sup>2+</sup> -transporting ATPase-like protein family | 11      | 0.11306 |
| Calcium Dependent Protein Kinase                          | 32      | 0.09901 |
| Caleosin                                                  | 6       | 0.35082 |
| Calnexin homolog family                                   | 2       | 0.76830 |
| Carbohydrate Esterase Family 13                           | 11      | 0.15808 |
| Carbohydrate Esterase Family 8                            | 52      | 0.06846 |
| Cation-chloride co-transporter family                     | 2       | 0.78255 |
| CDPKs                                                     | 32      | 0.09901 |
| Cell division protein FtsH-like protein family            | 14      | 0.16016 |
| Chlorophyll a/b-binding protein family                    | 13      | 0.85047 |
| Class III peroxidase                                      | 66      | 0.25959 |
| CMP-sialic acid transporter-like protein family           | 2       | 0.88042 |
| Core Cell Cycle Genes: CDKs                               | 11      | 0.29787 |
| Core Cell Cycle Genes: cyclins                            | 27      | 0.59289 |
| Core Cell Cycle Genes: DEL                                | 2       | 0.68202 |
| CRKs                                                      | 3       | 0.39357 |
| Cysteine synthase AtcysC1 family                          | 3       | 0.46986 |
| Cytochrome b-561 family                                   | 4       | 0.39614 |
| Cytochrome P450                                           | 207     | 0.06176 |
| Cytochromes b5                                            | 6       | 0.35260 |

|                                                                                       |     |         |
|---------------------------------------------------------------------------------------|-----|---------|
| Delta tonoplast integral protein family                                               | 29  | 0.07905 |
| EICBPs                                                                                | 6   | 0.33364 |
| eIF1 - eukaryotic initiation factor 1                                                 | 4   | 0.32756 |
| eIF2 - eIF2alpha eukaryotic initiation factor 2alpha                                  | 2   | 0.78261 |
| eIF2C - eukaryotic initiation factor 2C                                               | 2   | 0.79545 |
| eIF3d - eukaryotic initiation factor 3d                                               | 2   | 0.87194 |
| eIF3g - eukaryotic initiation factor 3g                                               | 2   | 0.85850 |
| eIF4A - eukaryotic initiation factor 4A                                               | 5   | 0.65693 |
| eIF4B - eukaryotic initiation factor 4B                                               | 3   | 0.47112 |
| Endoplasmic reticulum-type Ca-ATPase (ECA) family                                     | 3   | 0.56212 |
| Fatty Acid Multifunctional Protein                                                    | 2   | 0.63402 |
| Fe(II) transporter isolog family                                                      | 11  | 0.20179 |
| Globulin-like protein family                                                          | 2   | 0.84058 |
| Glucan Synthase-like; AtGsl                                                           | 7   | 0.24026 |
| Glycine-rich protein family                                                           | 3   | 0.96799 |
| Glycoside Hydrolase Family 13                                                         | 7   | 0.44074 |
| Glycoside Hydrolase Family 16                                                         | 27  | 0.14279 |
| Glycoside Hydrolase Family 18                                                         | 8   | 0.26576 |
| Glycoside Hydrolase Family 19                                                         | 13  | 0.24011 |
| Glycoside Hydrolase Family 28                                                         | 45  | 0.09509 |
| Glycoside Hydrolase Family 32                                                         | 7   | 0.23392 |
| Glycoside Hydrolase Family 77                                                         | 2   | 0.83818 |
| Glycoside Hydrolase Family 9                                                          | 21  | 0.11395 |
| Glycosyltransferase- Family 1                                                         | 75  | 0.05470 |
| Glycosyltransferase- Family 17                                                        | 5   | 0.25917 |
| Glycosyltransferase Family- 31                                                        | 27  | 0.08433 |
| Glycosyltransferase Family- 35                                                        | 2   | 0.87277 |
| Glycosyltransferase Family- 48                                                        | 10  | 0.28659 |
| Glycosyltransferase- Family 5                                                         | 4   | 0.55921 |
| Heat Stress Transcription Factor (Hsf) family                                         | 21  | 0.16547 |
| High affinity nitrate transporter family                                              | 7   | 0.18701 |
| Inorganic phosphate transporter family                                                | 7   | 0.36605 |
| Ketoacyl-CoA Synthase                                                                 | 20  | 0.16337 |
| KEULE Gene Family                                                                     | 2   | 0.72608 |
| Kinesin-like proteins                                                                 | 59  | 0.33636 |
| Lateral Organ Boundaries Gene Family                                                  | 26  | 0.08986 |
| LeOPT1 family                                                                         | 49  | 0.09435 |
| Lipase proteins                                                                       | 2   | 0.99186 |
| Lipid transfer protein family                                                         | 64  | 0.04193 |
| Lysophospholipase                                                                     | 9   | 0.25629 |
| MADS                                                                                  | 5   | 0.77070 |
| MADS Type I                                                                           | 32  | 0.51346 |
| MAPKKK: Raf subfamily                                                                 | 47  | 0.06716 |
| MAPKKKK                                                                               | 10  | 0.13555 |
| MIP family                                                                            | 33  | 0.07104 |
| Mitochondrial Acyl Carrier Protein                                                    | 3   | 0.65669 |
| MLO proteins                                                                          | 15  | 0.10140 |
| Monosaccharide (hexoses / pentoses)-H <sup>+</sup> symporter family (plasma membrane) | 14  | 0.12304 |
| MTN3-like protein family                                                              | 16  | 0.11039 |
| MYB3R- and R2R3- type MYB- encoding genes                                             | 125 | 0.04906 |
| Myotubularin-like Phosphoinositide 3-Phosphatase                                      | 2   | 0.79972 |
| Nodulin-like protein family                                                           | 55  | 0.09484 |
| NPSN Gene Family                                                                      | 3   | 0.44400 |

|                                                                                       |     |         |
|---------------------------------------------------------------------------------------|-----|---------|
| Nuclear envelope membrane protein-like family                                         | 2   | 0.84913 |
| Oleosins                                                                              | 13  | 0.49787 |
| Oligosaccharyl transferase STT3-like family                                           | 2   | 0.95156 |
| Permease 1-like family                                                                | 11  | 0.14118 |
| Phospholipase D                                                                       | 12  | 0.23594 |
| Phospholipase D beta                                                                  | 2   | 0.66492 |
| Phospholipase D: C2-PLD subfamily                                                     | 10  | 0.19499 |
| Plant defensins family 1                                                              | 4   | 0.37166 |
| Plant defensins family 3                                                              | 2   | 0.65958 |
| Plant U-box protein (PUB) Class II                                                    | 25  | 0.09442 |
| Plant U-box protein (PUB) Class III                                                   | 11  | 0.22895 |
| Plant U-box protein (PUB) Class IV                                                    | 8   | 0.16559 |
| Plant U-box protein (PUB) Class V                                                     | 6   | 0.21819 |
| Plant U-box protein (PUB) Class VI                                                    | 2   | 0.78015 |
| Plastid Lipid-associated Protein                                                      | 2   | 0.71293 |
| Plastidial Dihydroliipoamide Acetyltransferase; pyruvate DH complex                   | 4   | 0.55291 |
| Plastidial Hydroxyacyl-ACP Dehydrase                                                  | 2   | 0.87756 |
| Plastidial Lipoxygenase                                                               | 4   | 0.48401 |
| Plastidial Pyruvate Dehydrogenase E1 beta subunit                                     | 2   | 0.81061 |
| Pollen-surface Oleosin                                                                | 6   | 0.94996 |
| Polysaccharide Lyase Family 1                                                         | 22  | 0.10806 |
| Putative endosomal protein family                                                     | 12  | 0.61652 |
| Putative ER lumen protein retaining receptor family                                   | 6   | 0.23053 |
| Putative ligand-gated ion channel subunit family                                      | 19  | 0.10844 |
| Putative monosaccharide transporter family (ERD-group = induced by early dehydration) | 16  | 0.10867 |
| Putative Na <sup>+</sup> /H <sup>+</sup> antiporter family                            | 26  | 0.41198 |
| Putative phosphate/phosphoenolpyruvate translocator protein family                    | 15  | 0.17514 |
| Putative phosphatidate cytidyltransferase family                                      | 2   | 0.72411 |
| Putative P-type ATPase family                                                         | 14  | 0.12719 |
| Putative ribophorin I family                                                          | 2   | 0.83363 |
| Putative sugar transporter family                                                     | 45  | 0.05258 |
| Putative sulfate transporter family                                                   | 13  | 0.15495 |
| Putative tetracycline transporter protein family                                      | 3   | 0.39739 |
| Receptor kinase-like protein family                                                   | 288 | 0.04760 |
| Respiratory burst oxidase family                                                      | 10  | 0.32432 |
| Response Regulator: A- Type                                                           | 11  | 0.14574 |
| Sac domain-containing Phosphoinositide 5-Phosphatase                                  | 9   | 0.32911 |
| SAURs                                                                                 | 5   | 0.29257 |
| Stearoyl-ACP Desaturase                                                               | 6   | 0.31581 |
| Syntaxin                                                                              | 25  | 0.15458 |
| TGA3-like                                                                             | 4   | 0.63874 |
| Triacylglycerol Lipase                                                                | 4   | 0.48576 |
| Ubiquitin conjugating enzyme-like family                                              | 4   | 0.42717 |
| UDP-galactose transporter related protein-like family                                 | 2   | 0.74113 |
| Vacuolar proton-ATPase 16 kDa proteolipid family                                      | 6   | 0.58059 |
| V-Type ATPase                                                                         | 20  | 0.29381 |
| WRKY Transcription Factor                                                             | 59  | 0.14471 |

| Gene family (below 95 <sup>th</sup> percentile) | # Genes | PCC     |
|-------------------------------------------------|---------|---------|
| 14-3-3 proteins                                 | 12      | 0.05813 |
| 3-hydroxy-3-methylglutaryl-CoA reductase family | 2       | 0.08970 |
| 3-hydroxyisobutyryl-coenzyme A hydrolase family | 3       | 0.29645 |

|                                                                                                               |    |          |
|---------------------------------------------------------------------------------------------------------------|----|----------|
| 4CL (4-coumarate:CoA ligase)                                                                                  | 13 | 0.01970  |
| ABC Superfamily: GCN subfamily                                                                                | 5  | -0.02468 |
| ABC Superfamily: MDR subfamily                                                                                | 17 | -0.02098 |
| ABC superfamily: NAP subfamily                                                                                | 14 | 0.07109  |
| ABC Superfamily: RLI subfamily                                                                                | 2  | 0.14143  |
| ABC Superfamily: TAP subfamily                                                                                | 2  | 0.38340  |
| ABC Superfamily: WBC subfamily                                                                                | 28 | 0.04630  |
| Acetyl-CoA Synthetase                                                                                         | 3  | -0.08005 |
| Actin                                                                                                         | 8  | 0.11357  |
| Acyl Lipid Metabolism Family: Translocase                                                                     | 12 | 0.10700  |
| Acyl-ACP Thioesterase                                                                                         | 3  | -0.01066 |
| Acyl-Ceramide Synthase                                                                                        | 2  | -0.66866 |
| Acyl-CoA : Diacylglycerol Acyltransferase                                                                     | 2  | 0.02701  |
| Acyl-CoA Binding Protein                                                                                      | 4  | -0.05987 |
| Acyl-CoA Desaturase-like                                                                                      | 6  | 0.07793  |
| Acyl-CoA Thioesterase                                                                                         | 3  | 0.24201  |
| Adenylate translocator (brittle-1)-like family                                                                | 11 | 0.04117  |
| $\alpha$ -Dioxygenase-Peroxidase (involved in FA $\alpha$ -oxidation)                                         | 2  | 0.37725  |
| ADP-ATP carrier-like Protein family                                                                           | 4  | 0.00445  |
| AGC Family: AGC2 subfamily                                                                                    | 6  | -0.06147 |
| AGC family: NDR subfamily                                                                                     | 8  | 0.02461  |
| AGC Family: S6K subfamily                                                                                     | 2  | 0.22847  |
| Alcohol-forming Fatty Acyl-Coenzyme A Reductase                                                               | 8  | 0.07491  |
| Aldehyde dehydrogenase (ALDH) superfamily                                                                     | 14 | 0.08111  |
| Aldose 1-epimerase - like family                                                                              | 2  | -0.14526 |
| Allene Oxide Cyclase                                                                                          | 3  | 0.05021  |
| Alpha/beta hydrolase family                                                                                   | 4  | 0.20187  |
| Alpha-Expansin Gene Family                                                                                    | 23 | 0.04514  |
| $\alpha$ -Ketoacid Decarboxylase E1 $\alpha$ subunit; branched chain $\alpha$ -ketoacid dehydrogenase complex | 2  | 0.18834  |
| $\alpha$ -Ketoacid Decarboxylase E1 $\beta$ subunit; branched chain $\alpha$ -ketoacid dehydrogenase complex  | 2  | 0.40762  |
| Alternative oxidase family                                                                                    | 5  | 0.14133  |
| Amino acid transport protein family                                                                           | 3  | 0.11754  |
| Aminoalcoholphosphotransferase family                                                                         | 2  | -0.62121 |
| Ammonium transporter family                                                                                   | 5  | 0.16855  |
| AMP-binding protein; putative family                                                                          | 2  | 0.33056  |
| Anion channel protein family                                                                                  | 5  | 0.18669  |
| Ankyrin-like protein family                                                                                   | 11 | 0.07724  |
| Arabidopsis COBRA                                                                                             | 11 | -0.01637 |
| AtMRS2                                                                                                        | 9  | 0.12106  |
| ATP Citrate Lyase subunit A                                                                                   | 3  | 0.20781  |
| AtRER1C family                                                                                                | 4  | 0.13829  |
| AtTPS trehalose-6-phosphate synthase                                                                          | 10 | 0.09985  |
| Auxin transport protein family                                                                                | 8  | -0.00887 |
| Bax inhibitor-1 / TEGT protein homolog family                                                                 | 8  | -0.04821 |
| Beta-1,3-glucanase family                                                                                     | 5  | -0.11972 |
| Beta-carotene hydroxylase family                                                                              | 2  | 0.53890  |
| BETA-EXPANSINS                                                                                                | 5  | 0.02752  |
| Bifunctional Wax Ester Synthase / DAGAT                                                                       | 5  | -0.01716 |
| Blue copper binding protein family                                                                            | 21 | 0.03340  |
| C3H (p-Coumarate 3-hydroxylase); Cytochrome P450                                                              | 3  | 0.26136  |
| CAD (Cinnamyl alcohol dehydrogenase)                                                                          | 8  | -0.02428 |
| Cadmium-transporting ATPase-like family                                                                       | 2  | 0.22282  |

|                                                                   |    |          |
|-------------------------------------------------------------------|----|----------|
| Calmodulin-binding heat-shock - like family                       | 3  | 0.09874  |
| Carbohydrate Esterase Family 10                                   | 12 | 0.05749  |
| Carnitine racemase like family                                    | 2  | -0.40512 |
| Cationic amino acid transporter 1 family                          | 5  | -0.12528 |
| CB-HSPs                                                           | 3  | 0.09874  |
| CCoAOMT (Caffeoyl-CoA 3-O-methyltransferase)                      | 7  | 0.04334  |
| CCR (Cinnamoyl CoA reductase)                                     | 2  | 0.46843  |
| CCR-like                                                          | 5  | -0.07593 |
| Cellulose Synthase                                                | 22 | 0.05881  |
| CER1 Protein involved in wax synthesis                            | 5  | 0.01297  |
| CER2 family                                                       | 3  | 0.16045  |
| Choline Kinase                                                    | 4  | 0.22544  |
| Cinnamyl alcohol dehydrogenase family                             | 3  | 0.22887  |
| CNGCs                                                             | 19 | 0.06001  |
| COMT-like                                                         | 12 | 0.05459  |
| Copper transport protein-like family                              | 5  | -0.02854 |
| Core Cell Cycle Genes: CKS                                        | 2  | 0.43540  |
| Core Cell Cycle Genes: DP                                         | 2  | 0.30348  |
| Core Cell Cycle Genes: E2F                                        | 3  | 0.33882  |
| Core Cell Cycle Genes: KRP                                        | 6  | 0.05162  |
| CTP                                                               | 3  | -0.05553 |
| Cyclic nucleotide gated channel family                            | 19 | 0.06001  |
| Cyclopropane Fatty Acid Synthase                                  | 2  | 0.04227  |
| Cytochrome c putative family                                      | 2  | 0.61235  |
| Cytosolic Lipoxygenase                                            | 2  | 0.21785  |
| Cytosolic Phospholipase A2                                        | 2  | -0.34747 |
| DAD1-like Acylhydrolase                                           | 12 | 0.07489  |
| Delta 9 desaturase family                                         | 7  | 0.08928  |
| Diacylglycerol Kinase                                             | 8  | 0.07458  |
| Digalactosyldiacylglycerol Synthase                               | 2  | 0.22348  |
| Disease resistance protein family                                 | 11 | 0.10447  |
| EF1Balpha - elongation factor 1Balpha                             | 2  | 0.58689  |
| eIF1A - eukaryotic initiation factor 1A                           | 2  | 0.03856  |
| eIF2Balpha - eukaryotic initiation factor 2Balpha                 | 3  | -0.12140 |
| eIF2Bdelta - eukaryotic initiation factor 2Bdelta                 | 2  | 0.39819  |
| eIF2Bepsilon; g - eukaryotic initiation factor 2Bepsilon; 2Bgamma | 3  | -0.06083 |
| eIF2beta - eukaryotic initiation factor 2beta                     | 3  | 0.12008  |
| eIF2gamma - eukaryotic initiation factor 2gamma                   | 3  | -0.07928 |
| eIF3c - eukaryotic initiation factor 3c                           | 2  | -0.16737 |
| eIF4E - eukaryotic initiation factor 4E                           | 2  | 0.28289  |
| eIF4G - eukaryotic initiation factor 4G                           | 3  | -0.03543 |
| eIF5 - eukaryotic initiation factor 5                             | 2  | 0.13256  |
| eIF5A - eukaryotic initiation factor 5A                           | 3  | -0.21617 |
| eIF5B - eukaryotic initiation factor 5B                           | 2  | -0.25923 |
| eIF6 - eukaryotic initiation factor 6                             | 2  | 0.31571  |
| eIFiso4G - eukaryotic initiation factor 4G; isozyme form          | 2  | -0.03646 |
| ELO-like Elongase                                                 | 3  | 0.11024  |
| Epoxide Hydrolase                                                 | 5  | 0.02175  |
| ER 2-Lysophosphatidate Acyltransferase (LPAAT)                    | 12 | -0.00310 |
| ER CDP-Diacylglycerol Synthetase                                  | 2  | 0.11908  |
| ER Dihydroxyacetone-Phosphate Reductase                           | 4  | -0.04532 |
| Ethylene-regulated nuclear protein ERT2-like family               | 2  | 0.46200  |
| EXPANSIN-LIKE                                                     | 5  | 0.19238  |

|                                                    |    |          |
|----------------------------------------------------|----|----------|
| Fatty Acid Alcohol Oxidase                         | 4  | -0.02207 |
| Fatty Acid Amide Hydrolase                         | 3  | -0.18894 |
| Fatty acid desaturase family                       | 2  | 0.07239  |
| Fatty acid hydroxylase-like family                 | 2  | 0.49459  |
| Fatty Acid omega Hydroxylase                       | 8  | 0.02606  |
| F-Box Protein Subfamily                            | 3  | 0.29709  |
| FRO1-like protein; NADPH oxidase-like family       | 3  | 0.37246  |
| Fructose-bisphosphate aldolase family              | 2  | -0.27962 |
| GAD                                                | 3  | 0.23458  |
| Gamma-glutamyltransferase-like family              | 3  | -0.22642 |
| Germin-like protein family                         | 5  | 0.03709  |
| Glucosyltransferase like protein family            | 2  | 0.11185  |
| Glycerol-3-phosphate permease like protein family  | 5  | 0.22029  |
| Glycerophosphoryl Diester Phosphodiesterase        | 2  | 0.06719  |
| Glycoside Hydrolase Family 1                       | 38 | 0.03594  |
| Glycoside Hydrolase Family 10                      | 8  | 0.06872  |
| Glycoside Hydrolase Family 14                      | 8  | 0.11878  |
| Glycoside Hydrolase Family 17                      | 39 | 0.01395  |
| Glycoside Hydrolase Family 20                      | 2  | 0.16659  |
| Glycoside Hydrolase Family 27                      | 3  | -0.04059 |
| Glycoside Hydrolase Family 3                       | 10 | 0.03258  |
| Glycoside Hydrolase Family 31                      | 5  | 0.02036  |
| Glycoside Hydrolase Family 35                      | 12 | 0.02153  |
| Glycoside Hydrolase Family 36                      | 3  | -0.08460 |
| Glycoside Hydrolase Family 38                      | 3  | -0.15669 |
| Glycoside Hydrolase Family 47                      | 4  | -0.04863 |
| Glycoside Hydrolase Family 5                       | 10 | 0.11405  |
| Glycoside Hydrolase Family 51                      | 2  | 0.59740  |
| Glycoside Hydrolase Family 85                      | 2  | 0.12124  |
| Glycosyltransferase- Family 10                     | 3  | 0.02705  |
| Glycosyltransferase- Family 14                     | 9  | 0.07049  |
| Glycosyltransferase- Family 2                      | 32 | 0.00201  |
| Glycosyltransferase- Family 20                     | 10 | 0.06542  |
| Glycosyltransferase Family- 28                     | 3  | 0.15128  |
| Glycosyltransferase Family- 32                     | 3  | -0.06200 |
| Glycosyltransferase Family- 34                     | 5  | 0.17151  |
| Glycosyltransferase Family- 37                     | 7  | -0.07716 |
| Glycosyltransferase- Family 4                      | 17 | 0.00843  |
| Glycosyltransferase Family- 41                     | 2  | 0.29368  |
| Glycosyltransferase Family- 43                     | 3  | 0.34860  |
| Glycosyltransferase Family- 47                     | 3  | -0.09214 |
| Glycosyltransferase- Family 8                      | 32 | 0.04416  |
| GOS1 Gene Family                                   | 2  | -0.04644 |
| GPI-specific Phospholipase C                       | 2  | 0.60081  |
| Histidine Kinase                                   | 11 | 0.07521  |
| Histidine Phosphotransfer Proteins                 | 6  | 0.14636  |
| Homology to DNAJ heatshock protein family          | 3  | 0.28351  |
| HSP70s                                             | 6  | 0.09491  |
| Hydroxyisobutyryl-CoA Hydrolase                    | 3  | -0.18878 |
| Hypothetical proteins 1                            | 3  | 0.21944  |
| INDETERMINATE1-like zinc finger protein IDZ family | 11 | 0.03028  |
| Inner mitochondrial membrane family                | 3  | 0.02246  |
| IRE subfamily                                      | 3  | 0.10785  |

|                                                                                                   |    |          |
|---------------------------------------------------------------------------------------------------|----|----------|
| KCO5 protein family                                                                               | 4  | 0.24322  |
| Ketoacyl-CoA Reductase                                                                            | 2  | 0.48610  |
| Ketoacyl-CoA thiolase                                                                             | 3  | 0.08036  |
| Ketosphinganine Reductase                                                                         | 2  | 0.35736  |
| Lipid Acylhydrolase-like                                                                          | 15 | 0.03139  |
| Lipophosphoglycan biosynthetic protein - like family                                              | 2  | 0.43621  |
| Long-Chain Acyl-CoA Synthetase (other than plastidial or peroxisomal)                             | 6  | -0.06024 |
| Longin Group                                                                                      | 13 | 0.03065  |
| Low affinity calcium antiporter CAX2 family                                                       | 5  | 0.22594  |
| Magnesium Transporters                                                                            | 9  | 0.12106  |
| Mandelonitrile lyase-like protein family                                                          | 3  | -0.15052 |
| MAP Kinase                                                                                        | 20 | 0.02909  |
| MAP Kinase Kinase                                                                                 | 10 | 0.00591  |
| MAPKKK: MEKK subfamily                                                                            | 19 | 0.07081  |
| MAPKKK: ZIK subfamily                                                                             | 10 | 0.06713  |
| Membrin Gene Family                                                                               | 2  | 0.56408  |
| Metal-transporting P-type ATPase family                                                           | 3  | -0.15921 |
| Mitochondrial carrier protein family                                                              | 2  | -0.00738 |
| Mitochondrial carrier protein-Ribes nigrum family                                                 | 3  | 0.03989  |
| Mitochondrial Dihydrolipoamide Dehydrogenase; branched chain alpha-ketoacid dehydrogenase complex | 2  | -0.14323 |
| Mitochondrial Enoyl-CoA Hydratase                                                                 | 2  | 0.51300  |
| Mitochondrial Glycerol-Phosphate Acyltransferase                                                  | 3  | 0.13336  |
| Mitochondrial phosphate transporter family                                                        | 3  | 0.10276  |
| Mitochondrial Protein Translocase (MPT) Family                                                    | 6  | 0.03006  |
| Monoacylglycerol Lipase                                                                           | 13 | -0.01111 |
| Monogalactosyldiacylglycerol Synthase                                                             | 3  | 0.09142  |
| Monoxygenase family                                                                               | 2  | 0.56942  |
| Myosin-like proteins                                                                              | 17 | 0.07589  |
| Na <sup>+</sup> /H <sup>+</sup> antiporter-Putative family                                        | 2  | -0.57232 |
| Na <sup>+</sup> -dependent inorganic phosphate cotransporter-like protein family                  | 5  | -0.07873 |
| NADPH P450 reductases                                                                             | 3  | 0.00171  |
| Non specific Phospholipase C                                                                      | 5  | -0.10009 |
| Nramp2 family                                                                                     | 6  | 0.09208  |
| Nucellin; putative family                                                                         | 2  | -0.06396 |
| Nucleotide sugar epimerase -like family                                                           | 4  | 0.09238  |
| Omega-3 fatty acid desaturase family                                                              | 3  | 0.09933  |
| Oxo-Phytodienoic Acid Reductase (OPR)                                                             | 4  | 0.21905  |
| PABP - poly(A) binding protein                                                                    | 9  | 0.06839  |
| PAL (Phenylalanine ammonia lyase)                                                                 | 4  | 0.08511  |
| Patatin-like Acyl-Hydrolase                                                                       | 11 | 0.09220  |
| PCBPs                                                                                             | 3  | -0.23983 |
| PDK-1 subfamily                                                                                   | 2  | 0.38130  |
| PDR subfamily                                                                                     | 10 | 0.05330  |
| Peroxisomal Enoyl-CoA Hydratase                                                                   | 2  | -0.29598 |
| Peroxisomal Long-Chain Acyl-CoA Synthetase                                                        | 2  | 0.52754  |
| Peroxisomal membrane protein family                                                               | 2  | -0.22519 |
| P-glycoprotein-2                                                                                  | 23 | 0.00140  |
| Phosphate/triose-phosphate translocator family                                                    | 7  | -0.03275 |
| Phosphatidylcholine : Diacylglycerol Acyltransferase                                              | 3  | -0.28827 |
| Phosphatidylglycerophosphate synthase-like protein family                                         | 2  | 0.33286  |
| Phosphatidylinositol Phosphate Kinase type I/II A                                                 | 2  | 0.54036  |
| Phosphatidylinositol Phosphate Kinase type I/II B                                                 | 9  | 0.05562  |

|                                                                                        |    |          |
|----------------------------------------------------------------------------------------|----|----------|
| Phosphatidylinositol Phosphate Kinase type III                                         | 4  | 0.23936  |
| Phosphatidylinositol Synthase                                                          | 2  | -0.16687 |
| Phosphatidylinositol synthase family                                                   | 2  | -0.16687 |
| Phosphatidylinositol-4-Kinase g                                                        | 6  | 0.16274  |
| Phosphatidylserine Decarboxylase                                                       | 3  | -0.14048 |
| Phosphoethanolamine N-Methyltransferase                                                | 3  | 0.20907  |
| Phospholipase D alpha                                                                  | 4  | -0.05103 |
| Phosphoribosylanthranilate transferase family                                          | 15 | 0.01807  |
| Phytochromes                                                                           | 5  | 0.20001  |
| Pirin-like proteins                                                                    | 3  | -0.01578 |
| PI-specific Phospholipase C                                                            | 7  | 0.15902  |
| Plant defensins family 2                                                               | 6  | 0.08298  |
| Plasma membrane H <sup>+</sup> -ATPase family                                          | 12 | 0.05068  |
| Plastidial Acyl Carrier Protein                                                        | 4  | 0.17225  |
| Plastidial CDP-Diacylglycerol Synthetase                                               | 3  | -0.00695 |
| Plastidial Dihydrolipoamide Dehydrogenase; pyruvate DH complex                         | 2  | 0.50022  |
| Plastidial Ketoacyl-ACP Reductase                                                      | 4  | -0.05862 |
| Plastidial Long-Chain Acyl-CoA Synthetase                                              | 3  | 0.08434  |
| Plastidial Pyruvate Dehydrogenase E1 alpha subunit                                     | 2  | -0.20045 |
| PMP subfamily                                                                          | 2  | -0.14492 |
| Polysaccharide Lyase Family 4                                                          | 4  | 0.06772  |
| Potassium-dependent sodium-calcium exchanger like-family                               | 3  | -0.14664 |
| PPI                                                                                    | 2  | 0.20979  |
| PPT1-like Thioesterase                                                                 | 7  | 0.11096  |
| Profilin                                                                               | 4  | 0.00617  |
| Protein N-Myristoyltransferase                                                         | 2  | 0.31471  |
| PTEN-like Phosphoinositide 3-Phosphatase                                               | 3  | 0.21021  |
| Purine permease family                                                                 | 10 | 0.00885  |
| Purple acid phosphatase family                                                         | 2  | 0.20670  |
| Putative ABC transporter                                                               | 38 | 0.03054  |
| Putative acyl-CoA:1-acylglycerol-3-phosphate acyltransferase family                    | 4  | -0.17273 |
| Putative anion exchange protein family                                                 | 6  | -0.09719 |
| Putative b-keto acyl reductase family                                                  | 2  | 0.48610  |
| Putative C-4 sterol methyl oxidase family                                              | 4  | 0.08999  |
| Putative cationic amino acid transporter family                                        | 8  | 0.00836  |
| Putative CDP-diacylglycerol synthetase family                                          | 3  | -0.17470 |
| Putative ethylene receptor; ERS2 family                                                | 5  | 0.21939  |
| Putative expansin family                                                               | 3  | 0.26155  |
| Putative glucosyltransferase family                                                    | 13 | 0.07702  |
| Putative glutamate-/aspartate-binding peptide family                                   | 4  | 0.13938  |
| Putative glutaredoxin family                                                           | 4  | 0.25638  |
| Putative glutathione transferase family                                                | 2  | 0.57730  |
| Putative kinesin heavy chain family                                                    | 3  | 0.38014  |
| Putative lipase family                                                                 | 2  | 0.55111  |
| Putative mitochondrial carrier protein family                                          | 3  | -0.08252 |
| Putative monosaccharide transporter family (homology to bacterial xylose transporters) | 3  | 0.17767  |
| Putative monosaccharide transporter family (large central loop)                        | 3  | -0.26832 |
| Putative monosaccharide transporter family (plastidic localization)                    | 4  | 0.00475  |
| Putative Na <sup>+</sup> dependent ileal bile acid transporter family                  | 5  | 0.11768  |
| Putative NADH dehydrogenase family                                                     | 3  | -0.12496 |
| Putative nucleoside transporter family                                                 | 4  | 0.06855  |
| Putative nucleotide-sugar transporter family                                           | 2  | 0.07744  |
| Putative obtusifoliol 14-alpha demethylase family                                      | 2  | -0.20778 |



|                                                                                               |    |          |
|-----------------------------------------------------------------------------------------------|----|----------|
| Putative oligopeptide transporter ISP4-like family                                            | 9  | 0.00907  |
| Putative phosphatidic acid phosphatase family                                                 | 4  | -0.23405 |
| Putative polyol (cyclic)-H <sup>+</sup> symporter family (tonoplast membrane ?)               | 4  | 0.19683  |
| Putative polyol (linear)-H <sup>+</sup> symporter family (plasma membrane ?)                  | 5  | 0.00521  |
| Putative potassium proton antiporter family                                                   | 3  | 0.25388  |
| Putative potassium transporter family                                                         | 16 | 0.03943  |
| Putative presenilin homolog family                                                            | 2  | 0.54302  |
| Putative protein transport protein SEC61 alpha subunit family                                 | 3  | 0.19271  |
| Putative receptor protein kinase family                                                       | 2  | 0.55283  |
| putative RING zinc finger protein family                                                      | 3  | -0.28762 |
| Putative sensory transduction histidine kinase family                                         | 2  | -0.14352 |
| Putative sterol-C5-desaturase family                                                          | 2  | 0.25891  |
| Putative tropinone reductase family                                                           | 8  | 0.06808  |
| Putative ubiquitin carboxyl terminal hydrolase family                                         | 2  | -0.11961 |
| Putative vacuolar proton-ATPase subunit 1 family                                              | 3  | 0.13648  |
| Putative zinc transporter ZIP2 - like family                                                  | 2  | -0.00278 |
| Receptor protein kinase-like family                                                           | 4  | 0.23809  |
| Receptor protein kinase-like protein family                                                   | 2  | -0.25491 |
| Resistance-Nodulation-Cell Division (RND) Superfamily                                         | 2  | -0.02896 |
| Response Regulator: B- Type                                                                   | 10 | -0.02861 |
| Response Regulator: Pseudo                                                                    | 8  | 0.06232  |
| Reticuline oxidase-like family                                                                | 3  | 0.03285  |
| RF1 - release factor 1                                                                        | 2  | -0.60022 |
| Sec14-like Protein                                                                            | 2  | 0.61911  |
| Secretory carrier membrane protein family                                                     | 4  | -0.02344 |
| Senescence-associated protein homolog family                                                  | 11 | 0.05140  |
| Signal recognition particle receptor beta subunit-like family                                 | 2  | 0.50250  |
| Single gene-encoded CBPs                                                                      | 11 | 0.09583  |
| Single Myb Histone (SMH)                                                                      | 5  | 0.07356  |
| SNAP33 Gene Family                                                                            | 3  | -0.07825 |
| SNAREs: VTI1 Gene Family                                                                      | 3  | 0.07530  |
| SNF1 related protein kinase family                                                            | 3  | -0.08542 |
| Sodium proton exchanger family                                                                | 4  | -0.06299 |
| Sphingolipid delta 8 Desaturase                                                               | 2  | 0.07239  |
| Sphingolipid Fatty Acid Hydroxylase                                                           | 2  | 0.49459  |
| Sphingolipid Hydroxylase                                                                      | 2  | 0.23803  |
| Sphingosine Transfer Protein                                                                  | 2  | 0.59666  |
| Squalene epoxidase - like family                                                              | 6  | -0.02200 |
| Stelar K <sup>+</sup> outward rectifying channel (SKOR) family                                | 9  | 0.03006  |
| Subtilisin-like Serine Proteases                                                              | 53 | 0.02014  |
| Sucrose-H <sup>+</sup> symporters                                                             | 9  | 0.10969  |
| Sucrose-proton symporter family                                                               | 9  | 0.10969  |
| Sugar transporter family                                                                      | 9  | 0.05761  |
| Synaptobrevin -like protein family                                                            | 8  | 0.04583  |
| Triticum ABA induced membrane protein family                                                  | 3  | -0.03890 |
| Type II Phosphoinositide 5-Phosphatase                                                        | 4  | 0.14566  |
| Ubiquinol-cytochrome C reductase complex ubiquinone-binding protein (QP-C)-like family        | 2  | 0.52620  |
| UDP-GlcNAc:dolichol phosphate N-acetylglucosamine-1-phosphate transferase-like protein family | 2  | -0.27305 |
| Uncoupling protein family                                                                     | 4  | 0.22136  |
| Vacuolar H <sup>+</sup> -pyrophosphatase family                                               | 3  | 0.31216  |
| Vacuolar sorting receptor family                                                              | 6  | 0.11566  |
| Wax Synthase                                                                                  | 11 | 0.08455  |

---

|                                      |   |          |
|--------------------------------------|---|----------|
| WOX gene family                      | 9 | 0.02730  |
| Xyloglucan fucosyltransferase family | 3 | -0.09392 |
| Zinc transporter (ZAT) family        | 4 | 0.16244  |
